# Supplementary material for: Novel Semi-Replicative Retroviral Vector Mediated Double Suicide Gene Transfer Enhances Antitumor Effects in Patient-Derived Glioblastoma Models
Source: MDPI journal article supplement (doi:10.3390/cancers11081090), 2019-07-31
Supplement: s1 [file s1]

# Novel Semi-Replicative Retroviral Vector Mediated Double Suicide Gene Transfer Enhances Antitumor Effects in Patient-Derived Glioblastoma Models

Mijeong Lee, Yeon-Soo Kim, Kyoungmin Lee, Moonkyung Kang, Hyemi Shin, Jeong-Woo Oh, Harim Koo, Donggeon Kim, Yejin Kim, Doo-Sik Kong, Do-Hyun Nam and Hye Won Lee

## Materials and Methods

### 1. Drugs and Reagents

Respectively, ganciclovir and 5-fluorocytosine for both in vitro and in vivo assays were purchased from Roche (Cymevene® vial, Basel, Switzerland) and Sigma-Aldrich (F7129, MO, USA).

### 2. Sphere-Forming Culture of Patient-Derived GSCs

For in vitro expansion, GSCs were cultured in Neurobasal A media (NBA; 10888-022, Gibco, MA, USA) supplemented with N2 and B27 (0.5× each; 17502-048 and 12587-010, Gibco, MA, USA), human recombinant basic fibroblast growth factor (bFGF), and epidermal growth factor (20 ng/mL each; 233-FB-001MG/CF and 236-EG-01M, R&D Systems, MN, USA), as well as 100× penicillin streptomycin-glutamine (10378-016, Gibco, MA, USA) [1]. Next, GSCs were cultured at 37 °C in a humidified incubator containing 5% CO<sub>2</sub>.

### 3. Cell Proliferation Assay

Patient-derived glioblastoma stem-like cell (GSC)-based screening and analysis followed published methods.[1] Seven patient-derived GSCs were dissociated to single cells and seeded in 384-well plates with duplicates (500 cells per well). On day 6, cell viability was analyzed using an ATP monitoring system based on firefly luciferase (ATPlite 1 step, PerkinElmer, MA, USA) and estimated in EnVision Multilabel Reader (PerkinElmer, MA, USA).

### 4. sp-RRV Production

The TK and CD sp-RRV system was produced through transfecting  $6 \times 10^5$  293T cells with 2.0 µg of spRRVe-sEF1α-TK and 2.0 µg of sRRVgp-sEF1α-CD plasmids; Lipofectamine (18324-012, Invitrogen, MA, USA) and Plus reagents (11514-015, Invitrogen) per manufacturer protocol. After 48 h, the supernatant was harvested, filtered through 0.45-µm syringe filters, and stored at -80 °C. Residual plasmid DNA was removed from viral supernatant using DNaseI from the Retrovirus Titer Set (#6166, TaKaRa Bio Inc., Shiga, Japan). Next, real-time PCR (RT-PCR) was performed in 25-µL reaction volume, with the following thermocycling schedule: 42 °C for 5 min; 95 °C for 10 s; 40 cycles of 95 °C for 5 s and 60 °C for 30 s; 95 °C for 15 s, 60 °C for 30 s, and 95 °C for 15 s. A reference curve of retrovirus copy number was prepared via plotting C<sub>T</sub> (cycle threshold) values.

### 5. sp-RRV System Transduction of GSCs

Patient-derived GSC neurospheres were dissociated into single cells via a 1–3 min incubation at 37 °C after adding 1 mL Accutase in Dulbecco's phosphate-buffered saline without Ca<sup>2+</sup>/Mg<sup>2+</sup> Cell detachment solution (#AT-104, Innovative Cell Technologies, Inc., CA, USA). At 12–18 h post-seeding,  $5 \times 10^5$  GSCs were transduced with sp-RRVe-murine cytomegalovirus (MCMV) immediate-early promoter (spRRVe-MCMV-GFP), and red fluorescent protein (sRRVgp-MCMV-RFP) at a multiplicity of infection (MOI) = 1 for one week.

## 6. In Vivo Transduction Efficacy of Orthotopic Xenografts Based on Patient-Derived GSCs and sp-RRV System

All in vivo experiments were conducted following guidelines from the Association for Assessment and Accreditation of Laboratory Animal Care of the Samsung Medical Center Animal Use and Care Committee (Assurance no. A16-004) and the National Institute of Health (Bethesda, MD, USA) Guide for the Care and Use of Laboratory Animals (NIH publication 80-23). To establish orthotopic xenografts, 6-week-old female athymic BALB/c-nude mice were purchased from Orient Bio Inc. (Gyeonggi-do, South Korea). Two patient-derived GSC cell lines (N775T and N559T) suspended at  $2 \times 10^5$  cells/5  $\mu$ L in Hank's Balanced Salt Solution (HBSS; 14170-112, Gibco, MA, USA) were directly injected into mouse brains using a rodent stereotactic frame (coordinates: anterior/posterior +0.5 mm, medial/lateral +1.7 mm, dorsal/ventral -3.2 mm). These coordinates were also used for injections of spRRVe-MCMV-GFP and sRRVgp-MCMV-RFP ( $3 \times 10^7$  TU/5  $\mu$ L) 1 week after GSC implantation. All mice were then sacrificed upon observing either 20% of total body weight loss, or neurological symptoms such as lethargy, ataxia, and seizures. Whole brains were extracted and flash frozen for cryosectioning. To determine sp-RRV spread and GFP/RFP spectra, sections were examined with VECTRA 3.0 Automated Quantitative Pathology Imaging System and InForm (PerkinElmer, MA, USA), respectively. Furthermore, DAPI staining was used to reveal individual nuclei within defined regions of tissue sections.

## 7. Histological and Immunohistochemical (IHC) Analysis

Animals were sacrificed at different time points, and orthotopic tumor growth was analyzed after H&E staining of fixed brain tissues coronally sectioned at the thickness of 5  $\mu$ m. Briefly, the sections were deparaffinized, rehydrated, stained with HE, and scanned using Aperio AT Turbo Scanner (Leica Biosystems, Wetzlar, Germany). For IHC staining, sections were deparaffinized, rehydrated, and immersed in 3% hydrogen peroxide in methanol for 12 min to inactivate endogenous peroxidase. Then, sections were washed with PBS, blocked with 5% BSA (Gibco) in Dako REAL Peroxidase-Blocking Solution (S2023, Agilent, CA, USA), and incubated using anti-Ki-67 (1:200, #9027S, Cell Signaling, MA, USA), anti-CD31 (1:50, M0823, Agilent, CA, USA), and anti-CD68 (1:500, ab125212, Abcam, Cambridge, England) antibodies in antibody diluent with background (S3022, Agilent, CA, USA) and 5% BSA overnight at 4 °C. After incubation with the primary antibody, a mixed horseradish peroxidase-conjugated secondary antibody was applied onto the sections and allowed to incubate for 1 h at RT. Immuno-reactivity was visualized using diaminobenzidine tetrahydrochloride chromogenic substrate (Dako REAL™ EnVision™ Detection System, K5007, Agilent, CA, USA). Apoptosis extent per tumor was measured by TUNEL using a Calbiochem FragEL™ DNA Fragmentation Detection Kit and Colorimetric-TdT Enzyme (EMD Millipore) following manufacturer's protocol. Tissue sections were counterstained with hematoxylin, a coverslip was placed over the section, and sections were scanned using Aperio AT Turbo Scanner (Leica Biosystems).

## 8. Quantitative Analysis of IHC Staining

IHC images were captured with an automatic histologic imaging system (TissueFAXS, TissueGnostics GmbH, Vienna, Austria). The expression of Ki-67, TUNEL, CD31, and CD68 was quantified by HistoQuest Analysis Software using TissueFAXS system (TissueGnostics) after defining regions of interest. Several parameters, such as nuclei size and intensity of staining, were adjusted to achieve optimal cell detection. Cells were plotted to scattergrams according to human-specific marker signals. Cutoff thresholds were determined using signal intensity of the secondary antibody alone as negative control. Positive cell counts from images of immunohistolabeled sections were conducted by two independent observers blinded experimental conditions. The numbers of CD68-labeled tumor-associated macrophages (TAMs) were determined per 1 mm<sup>2</sup> using HistoQuest Analysis Software using TissueFAXS system. The expression of CD68 receptor, which mediates the recruitment and activation of macrophages, is a marker for both monocytes and tissue macrophages

[2]. Mean values for positive cells counted in five locations were evaluated. In areas with most intense CD31-positive neovascularization, micrographs were captured under  $\times 200$  magnification. Any endothelial cell or its cluster was considered as a single countable microvessel. The absolute number of quantified microvessels per area was considered as microvascular density.

## 9. Targeted-Panel Sequencing via GliomaSCAN™

Samples were profiled at the Samsung Medical Center using targeted-panel sequencing via GliomaSCAN™, a sequencing platform designed to target 312 genes specific for glioblastomas. An Agilent SureSelect kit (CA, USA) was used to capture exonic DNA fragments. The Illumina HiSeq 2000 instrument (CA, USA) was used to generate two 101 bp paired-end reads.

## 10. Whole Transcriptome Sequencing

Total RNA from patient-derived GSCs was isolated with a RNeasy mini kit (#74106, Qiagen, Hilden, Germany) as recommended by the manufacturer's protocol. For all samples, RNA-seq libraries were prepared from 500 ng total RNA using an Illumina TruSeq RNA Sample Prep kit. All sequenced reads were generated to include 30 nucleotides from the 5' end of each read. After generating low-quality reads, we aligned them to the human reference genome (hg19) using GSNAP (version 2012-12-20) [3]. The resulting alignments were sorted and summarized into BED files using SAMtools and bedTools. BED files were used to calculate read values per kilobase of transcript per million reads (RPKM) for each gene using R package "DEGseq."

## 11. Determination of Differentially Expressed Gene (DEG) and Gene Ontology (GO) Analysis of DEGs

DEGs were identified DEGseq, with the following cut-off threshold:  $|\log_2 \text{Fold change}| > 1.5$  and  $p \text{ value} \leq 0.05$ ,  $q \text{ value} \leq 0.1$ . Seven samples were divided into two groups: susceptible versus insusceptible. The online Database for Annotation, Visualization, and Integrated Discovery (DAVID) was used for GO analysis of identified DEGs.

## References

1. Lee, J.K.; Liu, Z.; Sa, J.K.; Shin, S.; Wang, J.; Bordyuh, M.; Cho, H.J.; Elliott, O.; Chu, T.; Choi, S.W.; et al. Pharmacogenomic landscape of patient-derived tumor cells informs precision oncology therapy. *Nat. Genet.* **2018**, *50*, 1399–1411.
2. Guadagno, E.; Presta, I.; Maisano, D.; Donato, A.; Pirrone, C.K.; Cardillo, G.; Corrado, S.D.; Mignogna, C.; Mancuso, T.; Donato, G.; et al. Role of Macrophages in Brain Tumor Growth and Progression. *Int. J. Mol. Sci.* **2018**, *19*.
3. Wu, T.D.; Nacu, S. Fast and SNP-tolerant detection of complex variants and splicing in short reads. *Bioinformatics* **2010**, *26*, 873–881.

**Table S1.** Genes associated with the resistance to sp-RRV harboring *TK* and *CD*.

| Gene Name      | Protein Name                                      | Gene Location | Function                                                                                                                                                                                                                   |
|----------------|---------------------------------------------------|---------------|----------------------------------------------------------------------------------------------------------------------------------------------------------------------------------------------------------------------------|
| <i>AMOTL1</i>  | Angiomotin-like protein 1                         | 11q21         | Inhibits the Wnt/beta-catenin signaling pathway by recruiting CTNNB1 to recycling endosomes                                                                                                                                |
| <i>CACNG7</i>  | Voltage-dependent calcium channel gamma-7 subunit | 19q13.42      | Regulates the activity of L-types calcium channels that contain CACNA1C as pore-forming subunit<br>Regulates the trafficking and gating properties of AMPA-selective glutamate receptors (AMPA-Rs)                         |
| <i>CALCRL</i>  | Calcitonin gene-related peptide type I receptor   | 2q32.1        | Receptor for calcitonin-gene-related peptide (CGRP) together with RAMP1 and receptor for adrenomedullin together with RAMP3                                                                                                |
| <i>CBLN1</i>   | Cerebellin-1                                      | 16q12.1       | Required for synapse integrity and synaptic plasticity<br>Induces accumulation of synaptic vesicles in the pre-synaptic part by binding                                                                                    |
| <i>CDH13</i>   | Cadherin-13                                       | 16q23.3       | Calcium-dependent cell adhesion proteins                                                                                                                                                                                   |
| <i>CDH15</i>   | Cadherin-15                                       |               |                                                                                                                                                                                                                            |
| <i>CH25H</i>   | Cholesterol 25-hydroxylase                        | 10q23.31      | Catalyzes the formation of 25-hydroxycholesterol from cholesterol<br>Plays an important role in regulating lipid metabolism by synthesizing a corepressor that blocks sterol regulatory element binding protein processing |
| <i>COL5A2</i>  | Collagen alpha-2(V) chain                         | 2q32.2        | A member of group I collagen<br>Binds to DNA, heparan sulfate, thrombospondin, heparin and insulin                                                                                                                         |
| <i>CPNE4</i>   | Copine-4                                          | 3q22.1        | Calcium-dependent phospholipid-binding protein that plays a role in calcium-mediated intracellular processes                                                                                                               |
| <i>CXCL12</i>  | Stromal cell-derived factor 1                     | 10q11.21      | Activates CXCR4 to induces a rapid and transient rise in the level of intracellular calcium ions and chemotaxis<br>Binds to atypical chemokine receptor ACKR3, which activates the beta-arrestin pathway                   |
| <i>DRD2</i>    | D(2) dopamine receptor                            | 11q23.2       | Dopamine receptor whose activity is mediated by G proteins which inhibit adenylyl cyclase                                                                                                                                  |
| <i>FAM131B</i> | Protein FAM131B                                   | 7q34          |                                                                                                                                                                                                                            |
| <i>FAT3</i>    | Protocadherin Fat 3                               | 11q14.3       | Play a role in the interactions between neurites derived from specific subsets of neurons during development                                                                                                               |
| <i>FBLIM1</i>  | Filamin-binding LIM protein 1                     | 1p36.21       | Implicated in cell shape modulation and motility by serving as an anchoring site for cell-ECM adhesion proteins and filamin-containing actin filaments                                                                     |
| <i>FCRLA</i>   | Fc receptor-like A                                | 1q23.3        | Implicated in B-cell differentiation and lymphomagenesis                                                                                                                                                                   |
| <i>FLRT2</i>   | Leucine-rich repeat transmembrane protein FLRT2   | 14q31.3       | Function in cell-cell adhesion, cell migration and axon guidance                                                                                                                                                           |
| <i>FOXF2</i>   | Forkhead box protein F2                           | 6p25.3        | Transcription activator for a number of lung-specific genes                                                                                                                                                                |
| <i>FZD8</i>    | Frizzled-8                                        | 10p11.21      | Receptor for Wnt proteins                                                                                                                                                                                                  |
| <i>H1FO</i>    | Histone H1.0                                      | 22q13.1       | Necessary for the condensation of nucleosome chains into higher-order structures                                                                                                                                           |

| Gene Name      | Protein Name                                             | Gene Location   | Function                                                                                                                                                                                  |
|----------------|----------------------------------------------------------|-----------------|-------------------------------------------------------------------------------------------------------------------------------------------------------------------------------------------|
|                |                                                          |                 | Found in cells that are in terminal stages of differentiation or that have low rates of cell division                                                                                     |
| <i>IGSF21</i>  | Immunoglobulin superfamily member 21                     | 1p36.13         | Selectively regulates inhibitory presynaptic differentiation through interacting with presynaptic NRXN2                                                                                   |
| <i>ITGA2</i>   | Integrin alpha-2                                         | 5q11.2          | A receptor for laminin, collagen, collagen C-propeptides, fibronectin and E-cadherin                                                                                                      |
| <i>JAG1</i>    | Protein jagged-1                                         | 20p12.2         | Ligand for multiple Notch receptors and involved in Notch signaling                                                                                                                       |
| <i>KCNJ6</i>   | G protein-activated inward rectifier potassium channel 2 | 21q22.13        | Allows potassium to flow into the cell                                                                                                                                                    |
| <i>KDR</i>     | Vascular endothelial growth factor receptor 2            | 4q12            | Promotes proliferation, survival, migration and differentiation of endothelial cells                                                                                                      |
| <i>KIRREL3</i> | Kin of IRRE-like protein 3                               | 11q24.2         | Homophilic adhesion molecule that promotes trans cellular interactions and stabilize mossy fiber filipodia contact and subsequent synapse formation                                       |
| <i>KLHL13</i>  | Kelch-like protein 13                                    | Xq24            | Substrate-specific adapter of a BTB-CUL3-RBX1 E3 ubiquitin-protein ligase complex required for mitotic progression and cytokinesis                                                        |
| <i>LPHN2</i>   | Adhesion G proteincoupled receptor L2                    | 1p31.1          | Calcium-independent receptor of low affinity for alpha-latrotoxin                                                                                                                         |
| <i>MIDN</i>    | Midnolin                                                 | 19q13.3         | Facilitates ubiquitin-independent degradation of polycomb protein CBX4                                                                                                                    |
| <i>MIR4661</i> | MicroRNA 4661                                            | 5q31.1          |                                                                                                                                                                                           |
| <i>NEURL1B</i> | E3 ubiquitin-protein ligase NEURL1B                      | 5q35.1          | E3 ubiquitin-protein ligase involved in regulation of the Notch pathway through influencing the stability and activity of several Notch ligands                                           |
| <i>NEUROD1</i> | Neurogenic differentiation factor 1                      | 2q31.3          | Associates with the p300/CBP transcription coactivator complex to stimulate transcription of the secretin gene as well as the gene encoding the CDKN1A                                    |
| <i>NOS2</i>    | Nitric oxide synthase, inducible                         | 17q11.2         | Involved in inflammation, enhances the synthesis of proinflammatory mediators such as NO, IL6 and IL8                                                                                     |
| <i>NRP1</i>    | Neuropillin-1                                            | 10p11.22        | Mediates the chemorepulsant activity of semaphorins<br>Coexpression with KDR results in increase VEGF 165 binding to KDR as well as increased chemotaxis                                  |
| <i>NUAK1</i>   | NUAK family SNF1-like kinase 1                           | 12q23.3         | Serine/threonine-protein kinase involved in various processes such as cell adhesion, regulation of cell ploidy, DNA damage response, senescence, cell proliferation and tumor progression |
| <i>ODZ2</i>    | Teneurin-2                                               | 5q34            | Induces homophilic cell-cell adhesion as a cellular signal transducer                                                                                                                     |
| <i>ODZ3</i>    | Teneurin-3                                               | 4q34.3-q35.1    | Involved in neural development by regulating the establishment of proper connectivity within the nervous system                                                                           |
| <i>PARD3</i>   | Partitioning defective 3 homolog                         | 10p11.22-p11.21 | Adapter protein involved in asymmetrical cell division and cell polarization                                                                                                              |

| Gene Name       | Protein Name                                                       | Gene Location | Function                                                                                                                                  |
|-----------------|--------------------------------------------------------------------|---------------|-------------------------------------------------------------------------------------------------------------------------------------------|
| <i>PCDHB5</i>   | Protocadherin beta-5                                               | 5q31.3        | Potential calcium-dependent cell-adhesion protein                                                                                         |
| <i>PCDHB10</i>  | Protocadherin beta-10                                              |               |                                                                                                                                           |
| <i>PRSS12</i>   | Neurotrypsin                                                       | 4q26          | Plays a role in neuronal plasticity and the structural reorganizations associated with learning and memory operations                     |
| <i>PTGFRN</i>   | Prostaglandin F2 receptor negative regulator                       | 1p13.1        | Inhibits the binding of prostaglandin F2-alpha to its specific FP receptor                                                                |
| <i>RCAN3</i>    | Calcipressin-3                                                     | 1p36.11       | Inhibits calcineurin-dependent transcriptional responses by binding to the catalytic domain of calcineurin A                              |
| <i>ROBO2</i>    | Roundabout homolog 2                                               | 3p12.3        | Receptor for SLIT2, and probably SLIT1, which are thought to act as molecular guidance cue in cellular migration                          |
| <i>SLC27A3</i>  | Long-chain fatty acid transport protein 3                          | 1q21.3        | Has acyl-CoA ligase activity for long-chain and very-long-chain fatty acids                                                               |
| <i>SNAI2</i>    | Zinc finger protein SNAI2                                          | 8q11.21       | Plays an essential role in TWIST1-induced EMT and its ability to promotes invasion and metastasis                                         |
| <i>SPOCK2</i>   | Testican-2                                                         | 10q22.1       | Participates in diverse steps of neurogenesis by binding calcium                                                                          |
| <i>SPON1</i>    | Spondin-1                                                          | 11p15.2       | Cell adhesion protein that promotes the attachment of spinal cord and sensory neuron cells and the outgrowth of neurites                  |
| <i>TCF7L1</i>   | Transcription factor 7-like 1                                      | 2p11.2        | Participates in the Wnt signaling pathway<br>Acts as a repressor in the absence of CTNNB1, and as an activator in its presence            |
| <i>TCF7L2</i>   | Transcription factor 7-like 2                                      | 10q25.2-q25.3 | A high mobility group box-containing transcription factor that plays a key role in the Wnt signaling pathway                              |
| <i>TLE4</i>     | Transducin-like enhancer protein 4                                 | 9q21.31       | Inhibits the transcriptional activation mediated by PAX5, and by CTNNB1 and TCF family members in Wnt signaling                           |
| <i>TMEM178A</i> | Transmembrane protein 178A                                         | 2p22.1        | Acts as a negative regulator of osteoclast differentiation in basal and inflammatory conditions by regulating TNFSF11-induced Ca fluxes   |
| <i>TP73</i>     | Tumor protein p73                                                  | 1p36.32       | Participates in the apoptotic responses to DNA damage                                                                                     |
| <i>TRIM62</i>   | E3 ubiquitin-protein ligase TRIM 62                                | 1p35.1        | E3 ubiquitin ligase whose activity is dependent on E2 ubiquitin-conjugating enzyme UBE2D2                                                 |
| <i>TSHZ3</i>    | Teashirt homolog 3                                                 | 19q12         | Transcriptional regulator involved in developmental processes association with APBB1, SET and HDAC factors as a transcriptional repressor |
| <i>TUBA4A</i>   | Tubulin alpha-4A chain                                             | 2q35          | Major constituent of microbules                                                                                                           |
| <i>VMAC</i>     | Vimentin-type intermediate filament-associated coiled-coil protein | 19p13.3       |                                                                                                                                           |
| <i>VWC2</i>     | Brorin                                                             | 7p12.2        | BMP antagonist playing a role in neural development and promoting cell adhesion                                                           |

| Gene Name      | Protein Name                    | Gene Location | Function                                                                                                                       |
|----------------|---------------------------------|---------------|--------------------------------------------------------------------------------------------------------------------------------|
| <i>WSCD2</i>   | WSC domain-containing protein 2 | 12q23.3       |                                                                                                                                |
| <i>ZDHHC23</i> | Palmitoyltransferase DHHC23     | 3q13.31       | Palmitoyltransferase that mediates palmitoylation of KCNMA1 involved in NOS1 regulation and targeting to the synaptic membrane |
| <i>ZNF518B</i> | Zinc finger protein 518B        | 4p16.1        | Involved in transcriptional regulation                                                                                         |

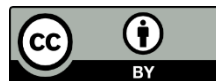

© 2019 by the authors. Licensee MDPI, Basel, Switzerland. This article is an open access article distributed under the terms and conditions of the Creative Commons Attribution (CC BY) license (<http://creativecommons.org/licenses/by/4.0/>).
